# Supplementary material for: New findings and current controversies in the reaction of ruthenium red and ammonium cerium(iv) nitrate: focus on the precipitated compound
Source: Royal Society of Chemistry journal article supplement (doi:10.1039/c9cy02499a), 2020-01-01
Supplement: c9cy02499a1.pdf [file c9cy02499a1.pdf]

# Electronic Supplementary Information

# New findings and current controversies in the reaction of ruthenium red and ammonium cerium(IV) nitrate: Focus on the precipitated compound

Bahram Sarvi,<sup>a</sup> Seyedeh Maedeh Hosseini,<sup>a</sup> Bahareh Deljoo,<sup>b,c</sup> Abdelhamid El-Sawy,<sup>d</sup> Alireza Shirazi Amin,<sup>e</sup> Mark Aindow<sup>b,c</sup>, Steven L. Suib,<sup>e,b,c\*</sup> and Mohammad Mahdi Najafpour<sup>a,f,g\*</sup>

- a. Department of Chemistry, Institute for Advanced Studies in Basic Science (IASBS), Zanjan, 45137-66731, Iran
- b. Institute of Materials Science, University of Connecticut, 97 North Eagleville Road, Storrs, CT, 06269-3136, USA
- c. Department of Materials Science and Engineering, University of Connecticut, 97 North Eagleville Road, Storrs, CT, 06269-3136, USA
- d. Department of Chemistry, Faculty of Science, Tanta University, 31527, Tanta, Egypt
- e. Department of Chemistry, University of Connecticut, 55 North Eagleville Road, Unit 3060, Storrs, CT, 06269-3060, USA
- f. Center of Climate Change and Global Warming, Institute for Advanced Studies in Basic Science (IASBS), Zanjan, 45137-66731, Iran
- g. Research Center for Basic Sciences & Modern Technologies (RBST), Institute for Advanced Studies in Basic Sciences (IASBS), Zanjan 45137-66731, Iran

\* Corresponding Authors: [steven.suib@uconn.edu](mailto:steven.suib@uconn.edu) (SS); [mmnajafpour@iasbs.ac.ir](mailto:mmnajafpour@iasbs.ac.ir) (MMN).

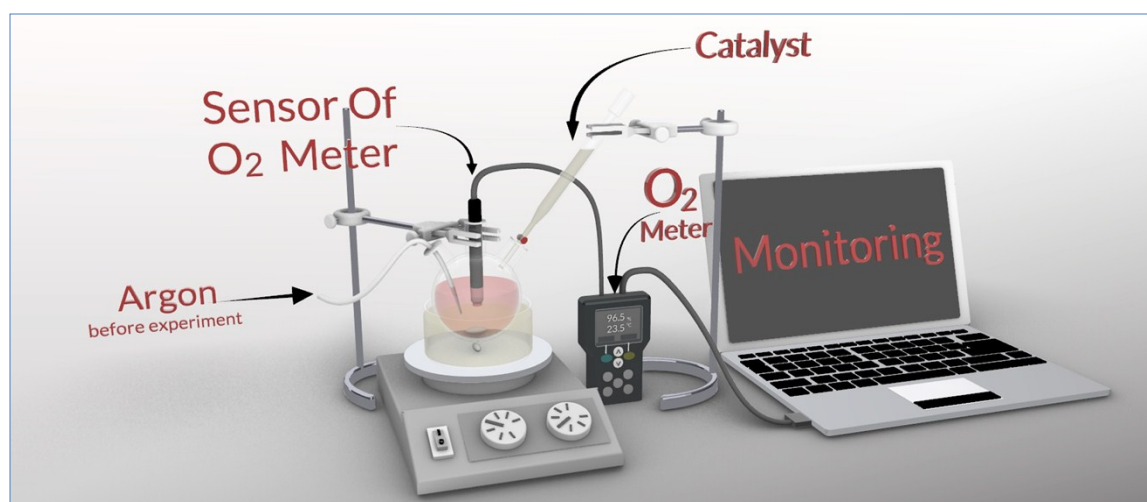

**Scheme S1.** Setup for oxygen-evolution experiment.

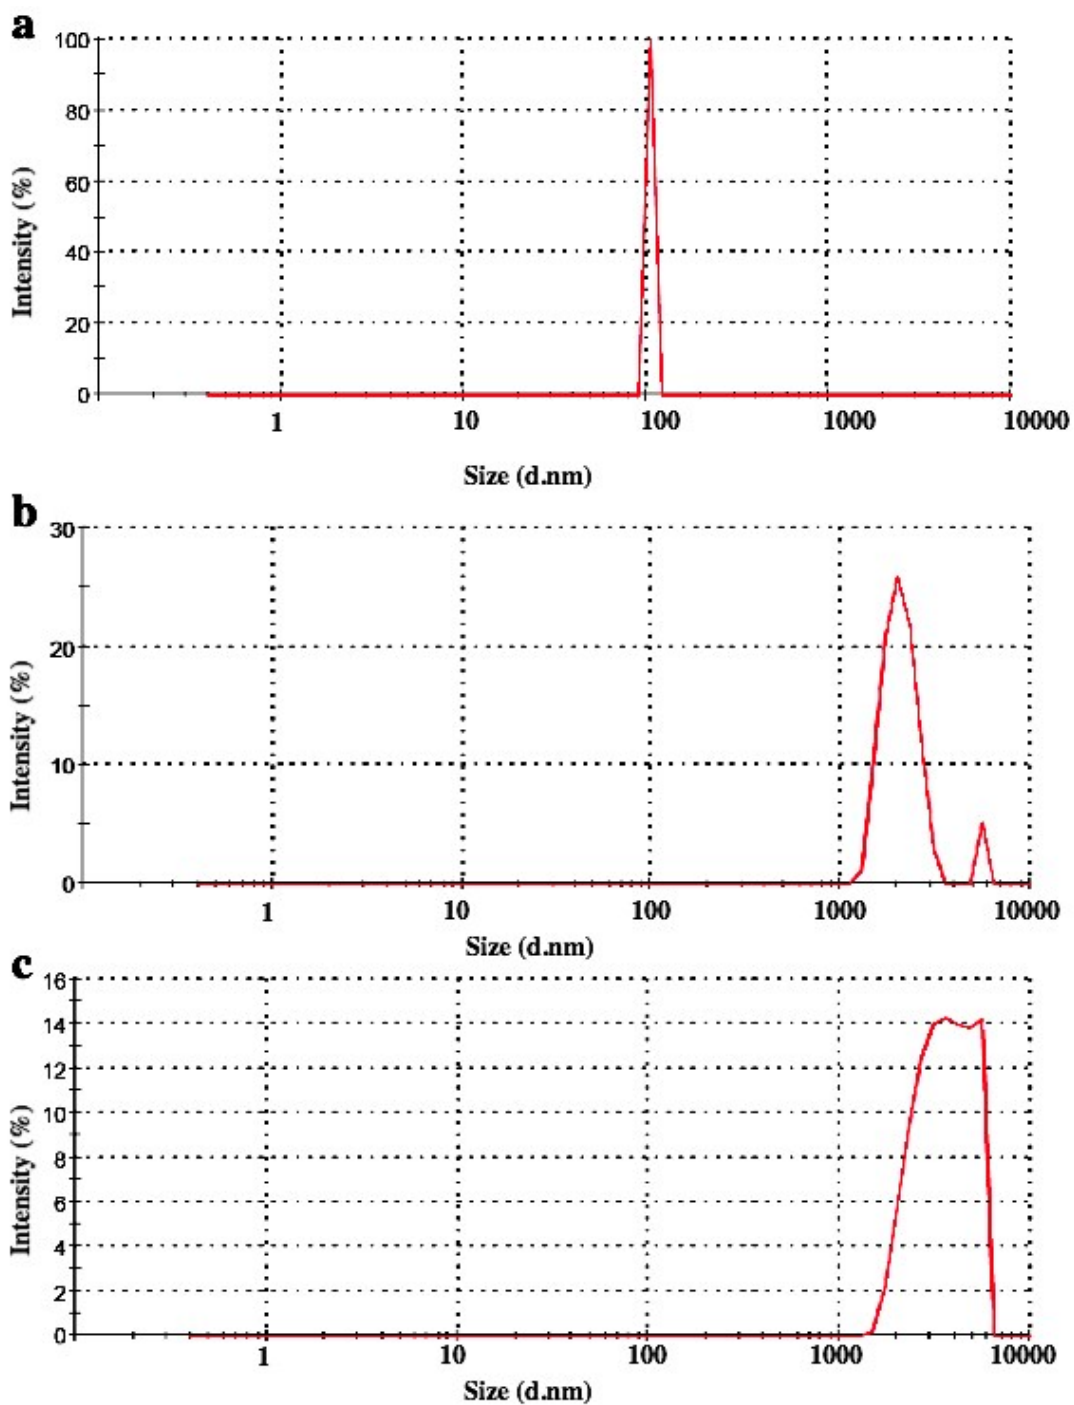

**Figure S1.** Dynamic light scattering (DLS) of the precipitate from the reaction of RuR and CAN: a) After one minute; b) After eight minutes; c) After twenty minutes.

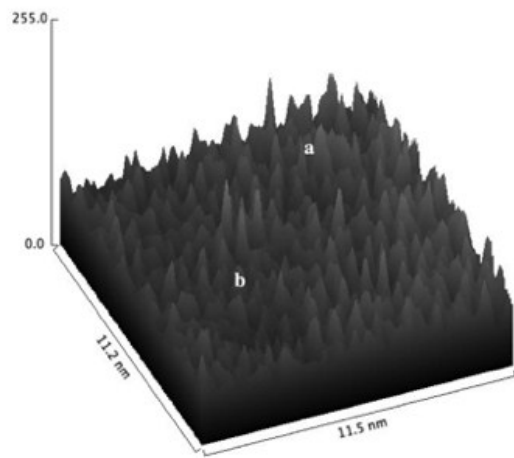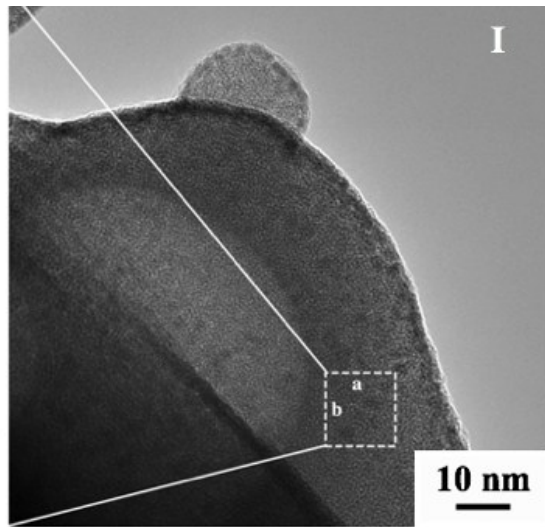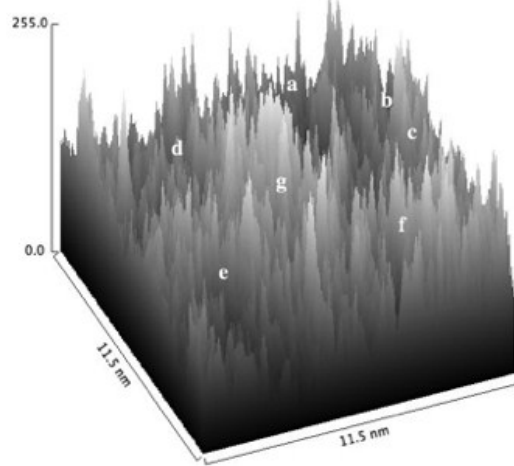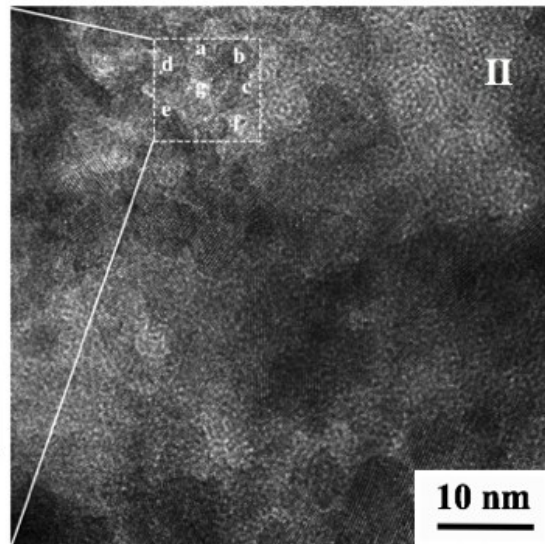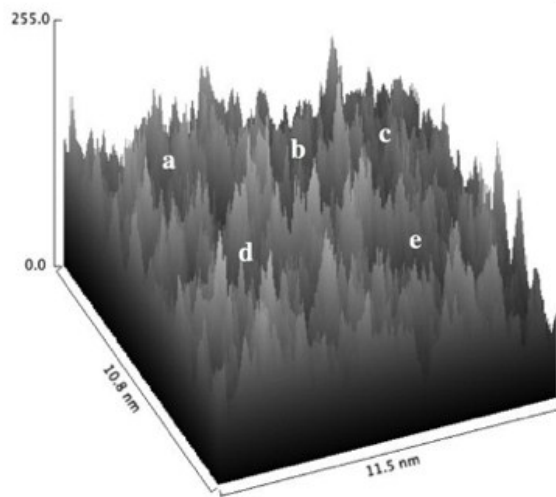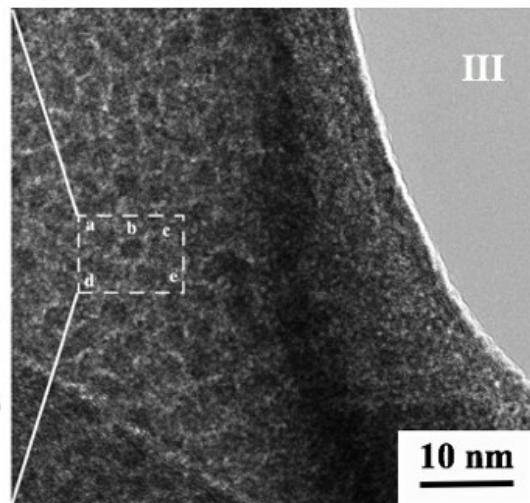

**Figure S2.** ImageJ surface plots of the selected areas of (I) RuR (II) obtained solid from the reaction RuR and CAN (III) the precipitate from the reaction of RuR and  $\text{NH}_4\text{NO}_3$  revealing the nanoparticle distributions.

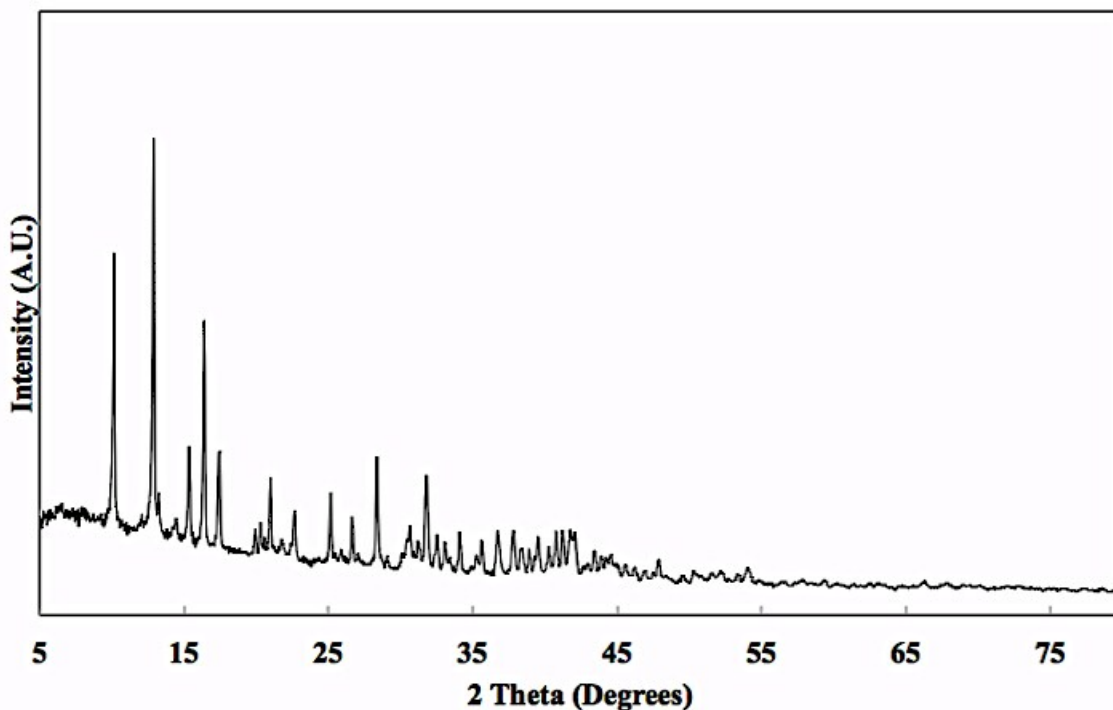

**Figure S3.** XRD pattern of the obtained solid from the reaction of RuR and CAN in the presence of excess CAN (The diffraction patterns of the product matched with JCPDS data card no. 98-009-6585  $[(\text{NH}_4)_2\text{Ce}(\text{NO}_3)_5(\text{H}_2\text{O})_2]$ ).

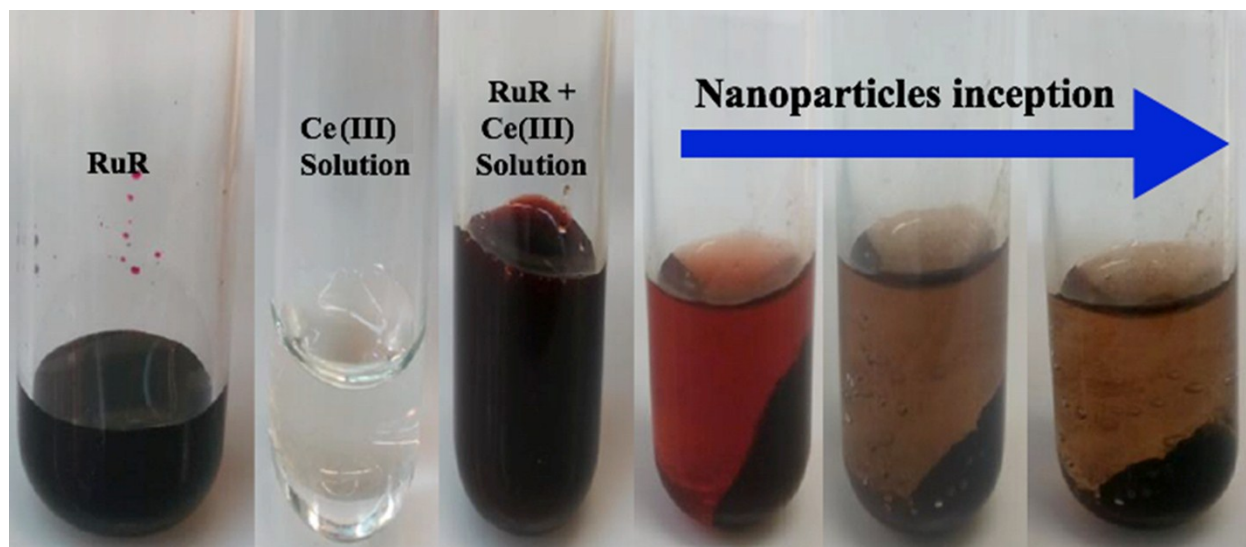

**Figure S4.** A solution of RuR in a reaction with  $(\text{NH}_4)_2[\text{Ce}(\text{NO}_3)_5(\text{H}_2\text{O})_2]$  and subsequent nanoparticle inception.

**Table S1.** Elemental composition (%) of RuR versus the product that was obtained from its reaction with CAN.

| Sample ID | Ru (%) | N (%) | O (%) | Cl (%) | Ce (%) |
|-----------|--------|-------|-------|--------|--------|
| RuR*      | 9.30   | 54.4  | 11.2  | 25.0   | -      |
| RuR + CAN | 11.8   | 50.4  | 14.6  | 22.1   | 0.97   |
